# Supplementary material for: Spontaneous polarization field-enhanced charge separation for an iron oxide photo-catalyst
Source: Royal Society of Chemistry journal article supplement (doi:10.1039/c7nj03629a), 2017-01-01
Supplement: c7nj03629a1.pdf [file c7nj03629a1.pdf]

New Journal of Chemistry

Supporting Information

## Spontaneous Polarization Field –Enhanced Charge Separation for Iron Oxide Photo-Catalyst

*Joseph Johnson, Nurlan Bakhranov, Md Moniruddin , and Nurxat Nuraje\**

Department of Chemical Engineering, Texas Tech University, Lubbock, TX79409

\*corresponding author: Nurxat.nuraje@ttu.edu

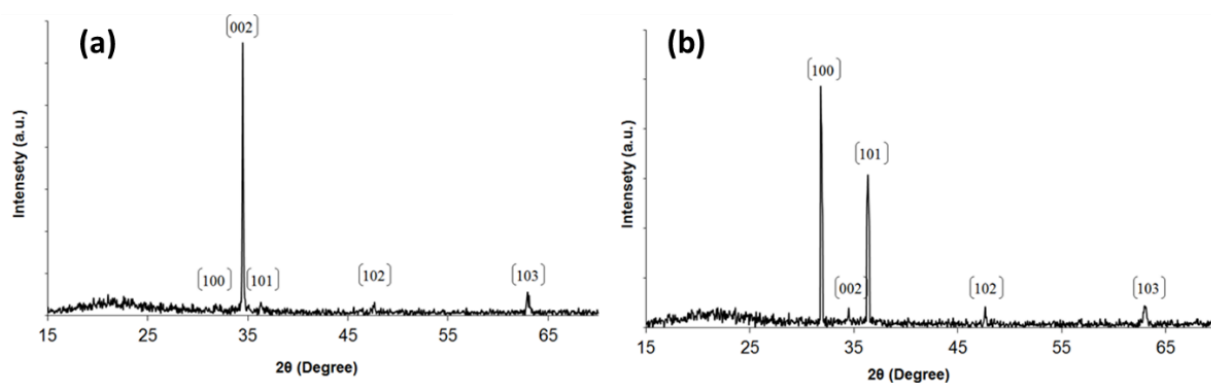

Figure 1. X-ray diffraction spectra of (a) ZnO nanorods and (b) nanosheets.
